# Supplementary material
Source: publisher site journal article supplement (https://www.dovepress.com/article/343050)

**Fig S1** depicts the comparison of LVOT residual gradient with primary outcomes and no primary outcomes. The following significant trends were observed: patients with primary outcomes yielded elevated levels of LVOT residual gradient ( $p=0.024$ )

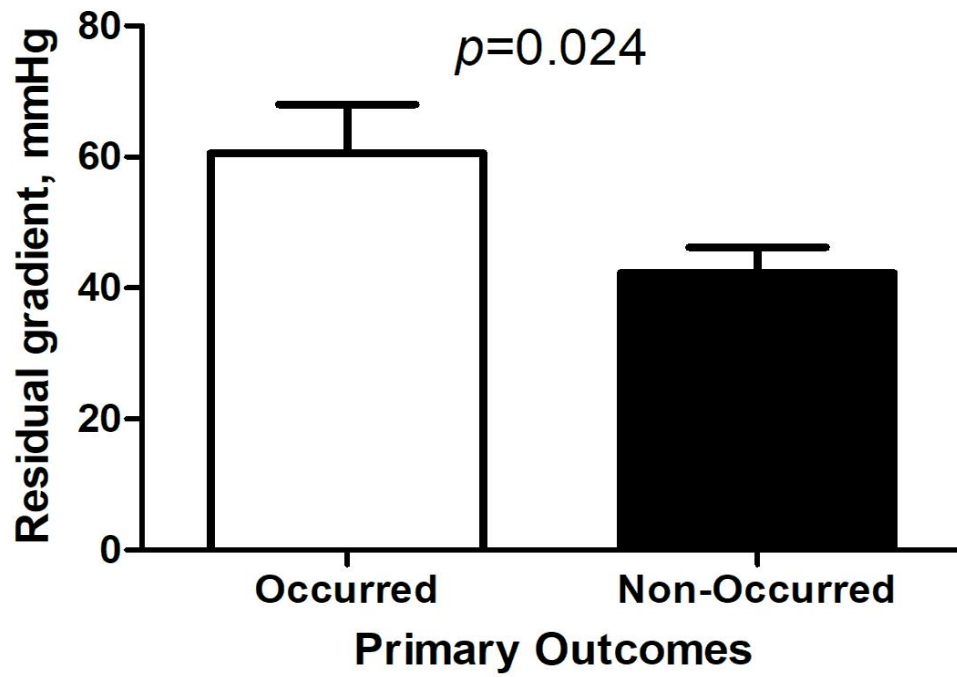

Supplement: Supplementary file 1 [file get_supplementary_file.php]
